# Supplementary material for: Cocoa flavanols protect endothelial function during prolonged sitting in healthy older adults
Source: Royal Society of Chemistry journal article supplement (doi:10.1039/d5fo02793d), 2026-01-01
Supplement: d5fo02793d1.pdf [file d5fo02793d1.pdf]

## Supplementary Information

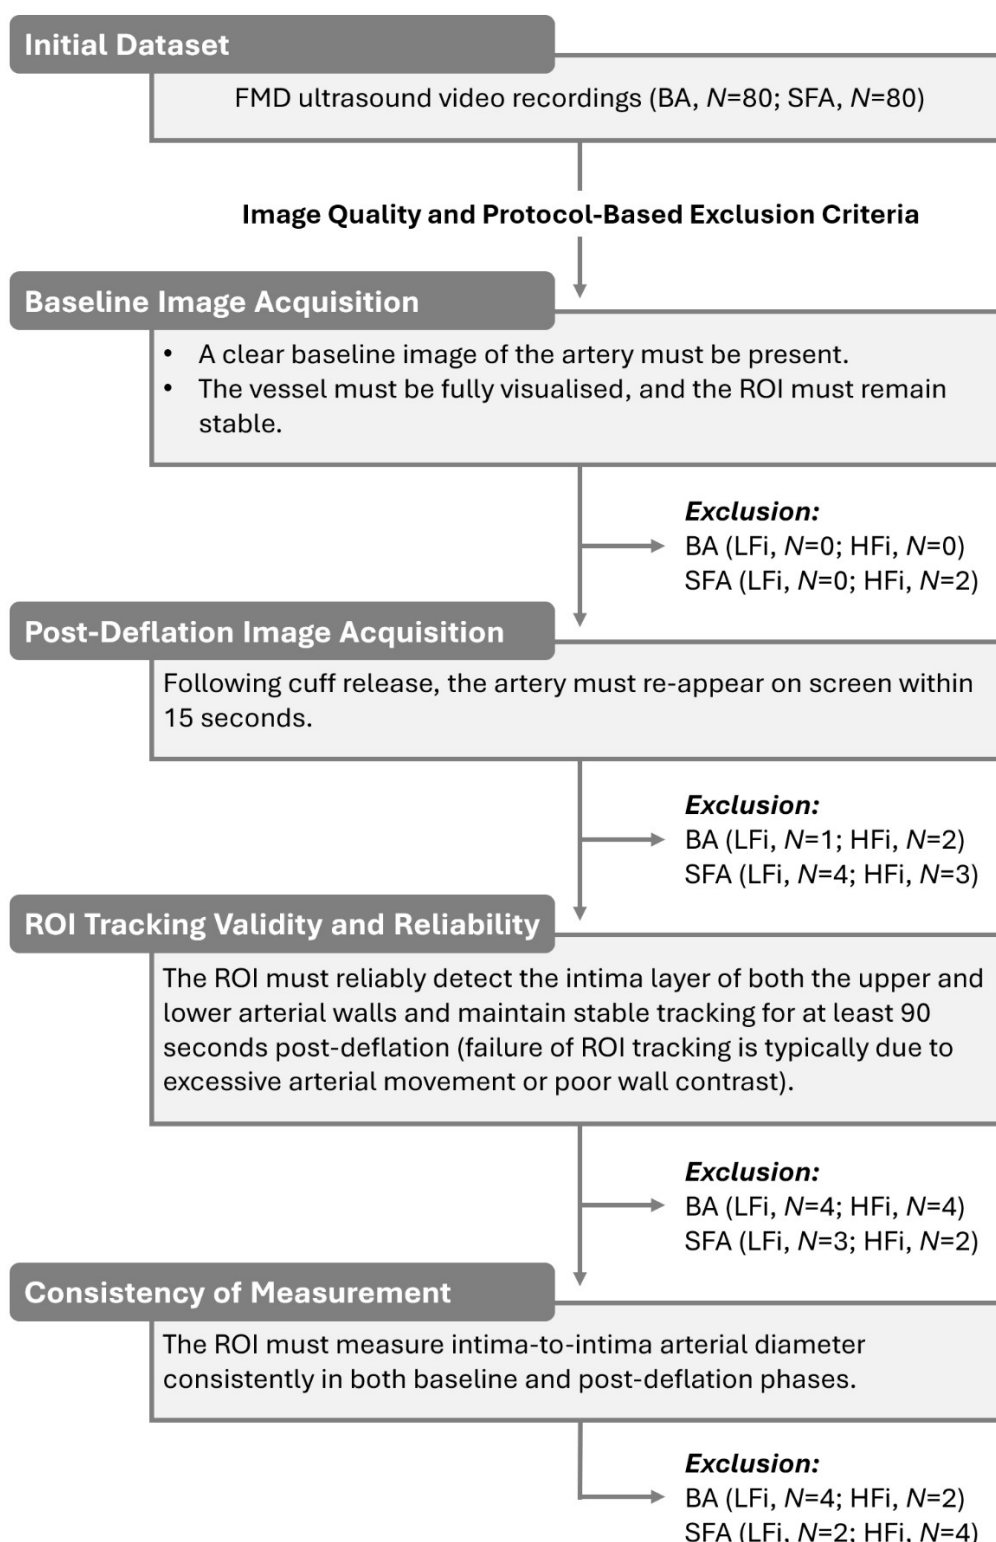

**Figure S1.** Consolidated Standards of Reporting Trials (CONSORT) flow diagram showing inclusion and exclusion of data points for the primary (femoral FMD) and secondary (brachial FMD) outcome measures. BA, brachial artery; FMD, flow-mediated dilation; HFI, high-flavanol intervention; LFI, low-flavanol intervention; ROI, region of interest; SFA, superficial femoral artery.
